# Supplementary material for: Autoantibodies against type I interferons are associated with multi-organ failure in COVID-19 patients
Source: Springer Nature journal article supplement (doi:10.1007/s00134-021-06392-4), 2021-04-09

## **SUPPLEMENTARY INFORMATION**

### **AUTOANTIBODIES AGAINST TYPE I INTERFERONS ARE ASSOCIATED WITH MULTI-ORGAN FAILURE IN COVID-19 PATIENTS**

Rutger Koning<sup>1</sup>, Paul Bastard<sup>2,3,4</sup>, Jean-Laurent Casanova<sup>2,3,4,5</sup>, Matthijs C. Brouwer,<sup>1</sup> Diederik van de Beek<sup>1</sup>,  
with the Amsterdam UMC Covid-19 Biobank investigators

<sup>1</sup>Amsterdam UMC, University of Amsterdam, Department of Neurology, Amsterdam Neuroscience  
Meibergdreef 9, 1100 DD Amsterdam, The Netherlands

<sup>2</sup>Laboratory of Human Genetics of Infectious Diseases, Necker Branch, INSERM U1163, Necker Hospital for  
Sick Children, Paris, France, EU

<sup>3</sup>University of Paris, Imagine Institute, Paris, France, EU

<sup>4</sup>St. Giles Laboratory of Human Genetics of Infectious Diseases, Rockefeller Branch, The Rockefeller  
University, New York, NY, USA.

<sup>5</sup>Howard Hughes Medical Institute, New York, NY, USA

**Supplementary Table 1: Characteristics of Covid-19 patients in the Amsterdam UMC Covid-19 biobank – Covid-19 patients tested for auto-Abs compared to patients not tested**

|                           | <b>Covid-19 patients tested<br/>for auto-Abs<br/>(N = 210)</b> | <b>Covid-19 patients not<br/>tested for auto-Abs<br/>(N = 263)</b> | <b>P-value</b> |
|---------------------------|----------------------------------------------------------------|--------------------------------------------------------------------|----------------|
| Age, years (median - IQR) | 63 (56-71)                                                     | 53 (51-73)                                                         | 0.771          |
| Gender (male)             | 134/210 (64%)                                                  | 154/263 (59%)                                                      | 0.256          |
| Comorbidities             |                                                                |                                                                    |                |
| Hypertension              | 105/210 (50%)                                                  | 102/262 (39%)                                                      | 0.031          |
| Diabetes                  | 63/210 (30%)                                                   | 63/263 (24%)                                                       | 0.144          |
| Obesity                   | 75/203 (36%)                                                   | 80/242 (30%)                                                       | 0.425          |
| Complications             |                                                                |                                                                    |                |
| Acute renal injury        | 21/210 (10%)                                                   | 12/263 (5%)                                                        | 0.028          |
| Bacterial pneumonia       | 28/210 (13%)                                                   | 22/258 (8%)                                                        | 0.100          |
| Thromboembolic event      | 44/210 (21%)                                                   | 26/263 (10%)                                                       | 0.001          |
| Clinical course           |                                                                |                                                                    |                |
| ICU admission             | 89/210 (42%)                                                   | 77/263 (29%)                                                       | 0.004          |
| Mortality                 | 57/210 (27%)                                                   | 31/263 (12%)                                                       | <0.001         |

**Supplementary Table 2: Baseline and clinical characteristics of non-Covid-19 intensive care unit controls**

|                                    | <b>Non-Covid-19 intensive care unit controls<br/>(N = 37)</b> |
|------------------------------------|---------------------------------------------------------------|
| Age, years (median - IQR)          | 63 (45 – 73)                                                  |
| Gender (male)                      | 28/37 (76%)                                                   |
| Comorbidities                      |                                                               |
| Hypertension                       | 10/37 (27%)                                                   |
| Diabetes                           | 6/37 (16%)                                                    |
| Obesity                            | 10/36 (28%)                                                   |
| Admission diagnosis                |                                                               |
| Cardiac arrest or surgery          | 15/37 (41%)                                                   |
| Traumatic injury                   | 8/37 (22%)                                                    |
| Aortic dissection                  | 2/37 (5%)                                                     |
| Gastro-intestinal surgery          | 2/37 (5%)                                                     |
| Gastro-intestinal bleeding         | 2/37 (5%)                                                     |
| Subarachnoid bleeding              | 2/37 (3%)                                                     |
| Kidney disease                     | 2/37 (5%)                                                     |
| Intoxication                       | 2/37 (5%)                                                     |
| Myasthenia gravis                  | 1/37 (3%)                                                     |
| Pancreatitis                       | 1/37 (3%)                                                     |
| Autoantibodies against type I IFNs | 6/37 (16%)                                                    |
| Mortality                          | 5/37 (14%)                                                    |

**Supplementary Table 3: Baseline characteristics and clinical course of Covid-19 patients with auto-Abs to IFN-Is without neutralizing ability *in vitro* compared to Covid-19 patients negative for auto-Abs**

|                         | <b>Patients with auto-Abs<br/>not neutralizing <i>in vitro</i><br/>(N = 26)</b> | <b>Patients without auto-Abs<br/>(N = 175)</b> | <b>Significance<br/>(P-value)</b> |
|-------------------------|---------------------------------------------------------------------------------|------------------------------------------------|-----------------------------------|
| Age, years median - IQR | 61 (50 – 75)                                                                    | 64 (56-71)                                     | 0.60                              |
| Gender, male            | 16/26 (62%)                                                                     | 111/175 (63%)                                  | 0.83                              |
| Comorbidities           |                                                                                 |                                                |                                   |
| Hypertension            | 14/26 (54%)                                                                     | 87/175 (50%)                                   | 0.83                              |
| Diabetes                | 10/26 (39%)                                                                     | 51/175 (29%)                                   | 0.36                              |
| Obesity                 | 13/25 (50%)                                                                     | 61/169 (36%)                                   | 0.13                              |
| Complications           |                                                                                 |                                                |                                   |
| Acute renal injury      | 5/26 (19%)                                                                      | 15/175 (9%)                                    | 0.15                              |
| Bacterial pneumonia     | 4/26 (15%)                                                                      | 20/175 (11%)                                   | 0.52                              |
| Thromboembolic event    | 4/26 (15%)                                                                      | 36/175 (21%)                                   | 0.79                              |
| Clinical course         |                                                                                 |                                                |                                   |
| ICU admission           | 12/26 (46%)                                                                     | 70/175 (40%)                                   | 0.67                              |
| Mortality               | 8/26 (31%)                                                                      | 44/175 (25%)                                   | 0.63                              |

**Supplementary Fig 1** Recruitment diagram

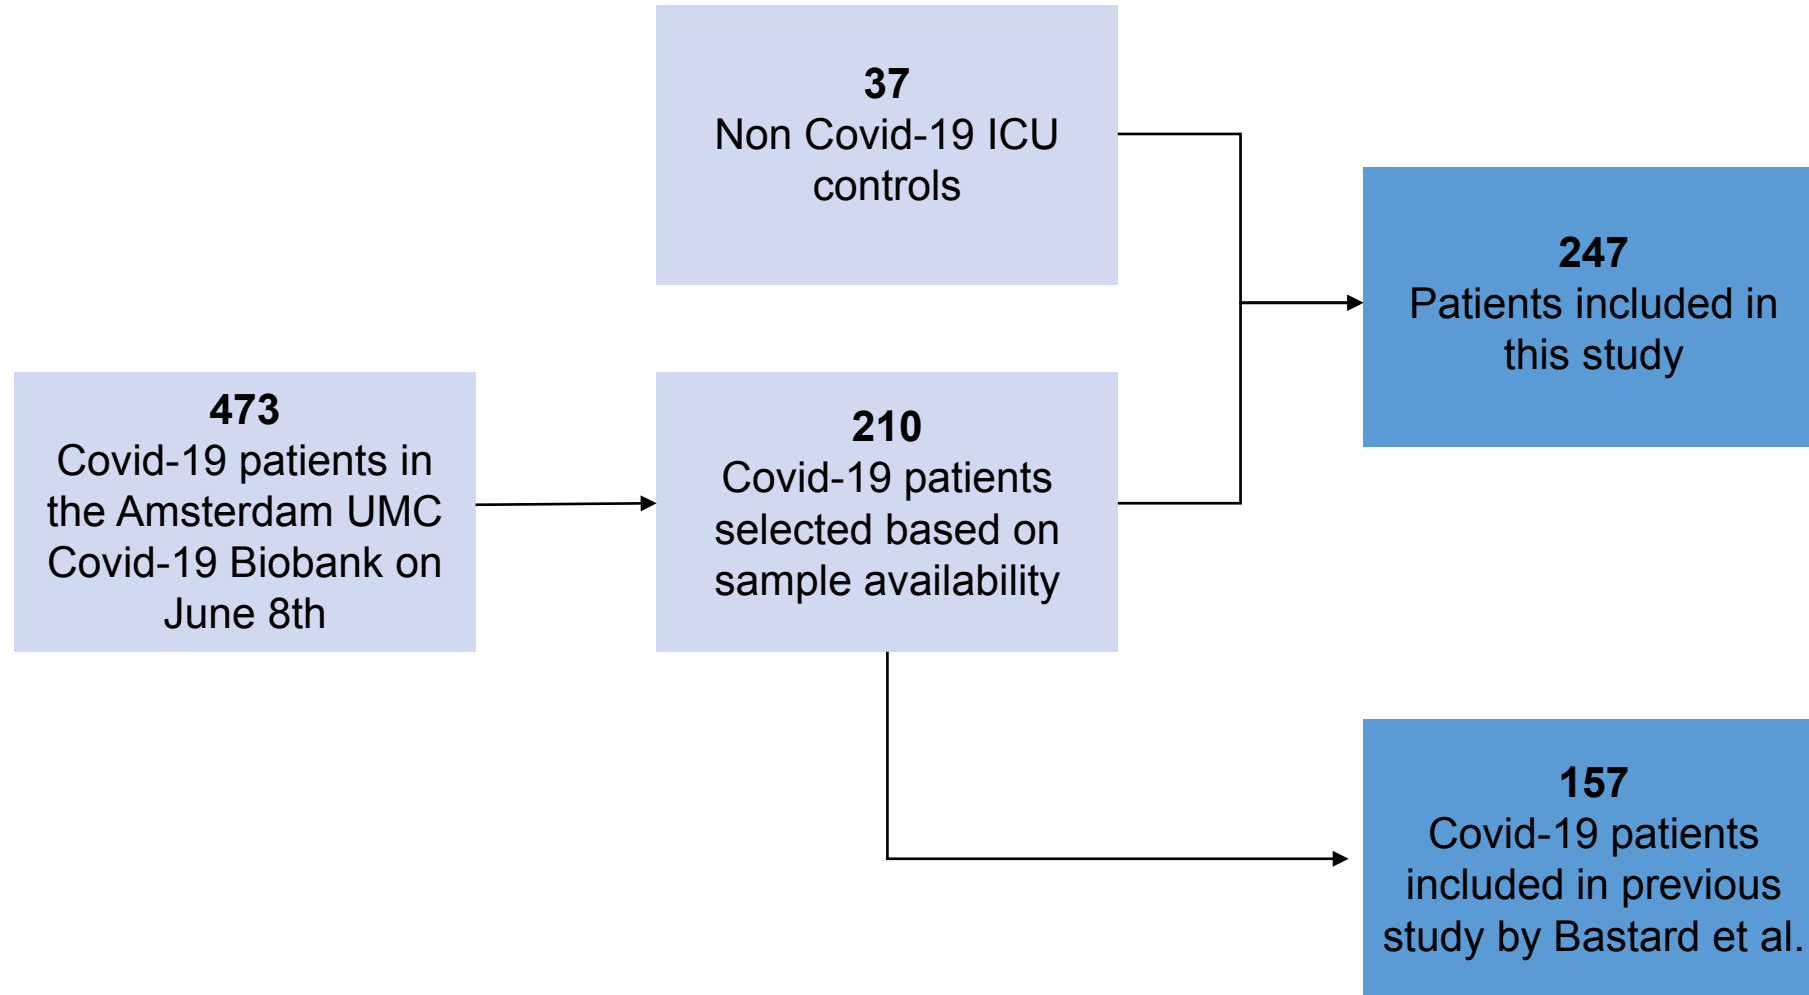

Supplement: MOESM1 [file 19050444]
